# Supplementary material for: Coffee Restores Expression of lncRNAs Involved in Steatosis and Fibrosis in a Mouse Model of NAFLD
Source: MDPI journal article supplement (doi:10.3390/nu13092952), 2021-08-25
Supplement: s1 [file s1]

**Supplementary Table S1.** Diet composition.

|                                 | <b>SD*</b> | <b>HFD<sup>#</sup></b> |
|---------------------------------|------------|------------------------|
| Casein                          | 210.0      | 265.0                  |
| L-Cystine                       | 3.0        | 4.0                    |
| High Amylose Corn Starch        | 500.0      | ---                    |
| Maltodextrin                    | 100.0      | 160.0                  |
| Sucrose                         | 39.14      | 90.0                   |
| Anhydrous Milk fat              | 20.0       | ---                    |
| Lard                            | 20.0       | 310.0                  |
| Soybean Oil                     | 20.0       | 30.0                   |
| Cellulose                       | 35.0       | 65.5                   |
| Mineral Mix, AIN-93G-MX (94046) | 35.0       | 48.0                   |
| Calcium Phosphate, dibasic      | ---        | 3.4                    |
| Vitamin Mix, AIN-93-VX (94047)  | 15.0       | 21.0                   |
| Choline Bitartrate              | 2.75       | 3.0                    |
| TBHQ, antioxidant               | 0.01       | ---                    |

**Supplementary Table S2.** Primer sequences of selected mouse lncRNAs and relative targets.

| <b>Gene</b> | <b>Forward primer</b>     | <b>Reverse primer</b>    |
|-------------|---------------------------|--------------------------|
| GM16551     | CTGAAAGCTTGTGCGGTGTC      | GCGAAGGGCGAGTCGG         |
| Srebfl      | CTCAAAGACCTGGTGGTGGG      | TGTGTGCACTTCGTAGGGTC     |
| Acaca       | CGATCTATCCGTCCGTGGTC      | TCCTCCAGGCACTGGAACAT     |
| Scd1        | CCAAGCTGGAGTACGTCTGG      | CAGAGCGCTGGTCATGTAGT     |
| CARMN       | TCATCCATCACCAAGGCCAC      | CCCAAACCACTACTCACCC      |
| SRA         | CCCACAGGATGGATCCCCTA      | CACCAGTAGCAGGACAGCTC     |
| H19         | CCTCAAGATGAAAGAAATGGTGCTA | TCAGAACGAGACGGACTTAAAGAA |
| Col1a1      | CCCCAGCCGCAAAGAGTCTA      | CAGCTGACTTCAGGGATGTCT    |
| FLRL1       | CCCATCTCTGTTGGTGACCT      | CGGCAAACTCAACCATTCTT     |
| FRL2        | TGGTGTGTGTGAGCCTGAGAA     | AGCAGCAAGTAATAGGATGAGCAA |
| Per3        | GCTCCGCCCCCTACAGTCA       | GTGTGTGCAGAGAGGACAGC     |
| Arntl       | TCATGAGCCTCTTGGAAGCA      | GGCCATGGCAAGTCACTAAAG    |
| CRNDE       | CATCAGTGTCTCGGCTCTGG      | ATCACCTCCTTCCACCGGG      |
| NEAT1       | TGGAGATTGAAGGCGCAAGT      | ACCACAGAAGAGGAAGCACG     |
| MEG3        | CGAGGACTTCACGCACAACA      | TCCCACGCAGGATTCCAGAT     |
| BLNC1       | TGGAGATTGAAGGCGCAAGT      | ACCACAGAAGAGGAAGCACG     |
| PVT1        | CCCTTTAAGCGTTCCAGAAGGA    | TCGTCTGTGTGACATCTGCT     |
| TUG1        | TCTGTCCAGAACCTCAGTGC      | AAGGTCATTGGCAGGTCCAG     |
| MALAT1      | TTTTGAGGGCTGACTGCCAA      | GGTTGTGCTGGCTCTACCAT     |
| LSTR        | GCAAGTGGCCAGTAAATCCG      | CGTTTGGGGCTCTGGATCAT     |
| GAPDH       | AGGTCGGTGTGAACGGATTG      | TGTAGACCATGTAGTTGAGGTCA  |

**Supplementary Table S3.** Liver histology scores.

| Steatosis Grade | Macrovesicular Steatosis |            | Microvesicular Steatosis |            |
|-----------------|--------------------------|------------|--------------------------|------------|
|                 | HFD                      | HFD+Coffee | HFD                      | HFD+Coffee |
|                 |                          |            |                          |            |
| 0               | 2                        | 8          | 3                        | 1          |
| 1               | 4                        | 0          | 1                        | 5          |
| 2               | 1                        | 0          | 0                        | 0          |
| 3               | 1                        | 0          | 4                        | 2          |

**Supplementary Table S4.** List of analyzed lncRNAs modulated or not modulated by coffee supplementation and relative targets.

| LncRNAs modulated by coffee     | Analyzed targets        |
|---------------------------------|-------------------------|
| GM16551                         | Srebf1<br>Acaca<br>Scd1 |
| H19                             | Col1a1<br>$\alpha$ -SMA |
| CARMN                           | /                       |
| SRA                             | /                       |
| FLRL1                           | Per3                    |
| FRL2                            | Arnl1                   |
| CRNDE                           | /                       |
| NEAT1                           | /                       |
| LncRNAs not-modulated by coffee |                         |
| MEG3                            |                         |
| BLNC1                           |                         |
| PVT1                            |                         |
| MALAT1                          |                         |
| LSTR                            |                         |
| GAPDH                           |                         |

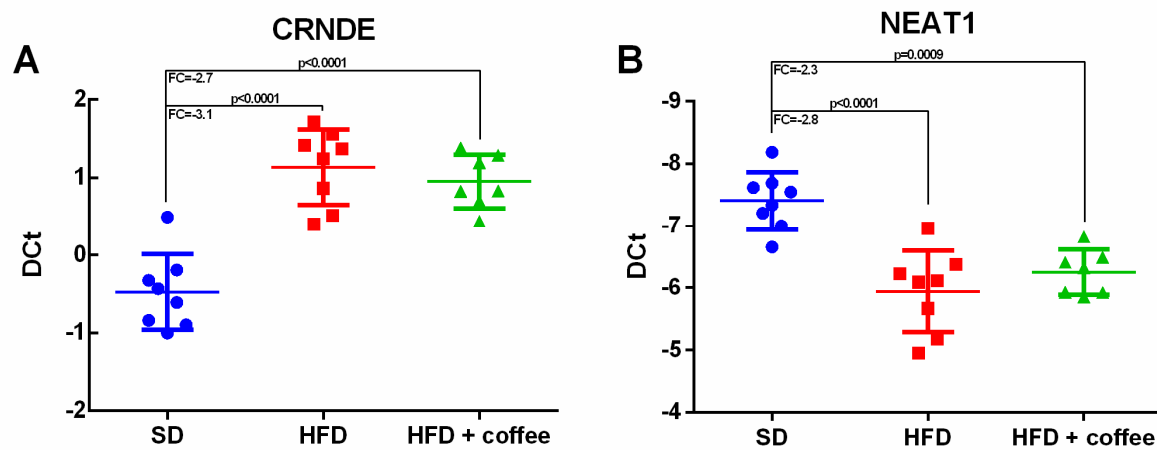

**Supplementary Figure S1.** Dot plots of CRNDE lncRNA and NEAT1 lncRNA, analyzed through qPCR in mice fed with Standard Diet (SD), High Fat Diet (HFD) and HFD plus decaffeinate coffee n=23: 8 SD, 8 HFD, 7 HFD+ coffee. Transcript statistical significance of DE transcripts was evaluated with one-way ANOVA with Tukey post-hoc test for multiple comparisons (two-tailed p-value < 0.05); FC= Fold Change.
